# Supplementary material
Source: publisher site journal article supplement (https://www.dovepress.com/article/540183)
Supplement: Supplementary file 1 [file Supplement%20Tables%201-7.docx]

**Supplement Table 1** Summary of Received Psychosocial Interventions, Medication Regimens, and Depressive Symptoms in Adolescent Participants (n = 146)

|  | **Possible score range** | **Mean (±SD) or**  ***n* (%)** | |
| --- | --- | --- | --- |
| Received psychosocial intervention |  |  |
| Yes |  | 20 (13.70) |
| No |  | 126 (86.30) |
| Frequency of medications prescribed (per day) |  |  |
| 1 time |  | 57 (39.04) |
| 2 times |  | 67 (45.89) |
| 3 times |  | 16 (10.96) |
| ≥ 4 times |  | 6 (4.11) |
| Depression scores | 0 - 60 | 32.30 (±10.21) |
| No depression | < 21 | 18 (12.33) |
| Mild depression | 21 - 25 | 20 (13.70) |
| Moderate depression | 26 - 34 | 50 (34.25) |
| Severe depression | 35 - 40 | 31 (21.23) |
| Very severe depression | > 40 | 27 (18.49) |

**Notes:** SD, standard deviation

**Supplement Table 2** Summary of the Antidepressant Side-Effect Checklist (n = 146)

| **Symptoms** | **Score (0 to 3)** | **Related to antidepressants** |
| --- | --- | --- |
| **Mean (SD)** | **N (%)** |
| ASEC score (0 – 63) | 22.06 (±12.17) |  |
| 1. Drowsiness | 1.92 (1.06) | 77 (52.74) |
| 2. Yawning | 1.89 (1.12) | 58 (39.73) |
| 3. Palpitations | 1.20 (1.07) | 47 (32.19) |
| 4. Weight gain | 1.30 (1.27) | 44 (30.14) |
| 5. Decreased appetite | 1.20 (1.16) | 41 (28.08) |
| 6. Tremor | 1.03 (1.15) | 36 (24.66) |
| 7. Insomnia (difficulty sleeping) | 1.53 (1.16) | 33 (22.60) |
| 8. Nausea or vomiting | 0.68 (.92) | 33 (22.60) |
| 9. Feeling light-headed on standing | 1.46 (1.22) | 32 (21.92) |
| 10. Increased appetite | 0.99 (1.21) | 30 (20.55) |
| 11. Disorientation | 1.31 (1.21) | 30 (20.55) |
| 12. Dry mouth | 1.42 (1.12) | 27 (18.49) |
| 13. Headache | 1.31 (1.07) | 25 (17.12) |
| 14. Feeling like the room is spinning | 0.92 (1.09) | 24 (16.44) |
| 15. Sweating | 1.01 (1.16) | 21 (14.38) |
| 16. Constipation | 0.64 (.94) | 18 (12.33) |
| 17. Blurred vision | 0.65 (1.00) | 15 (10.27) |
| 18. Increased body temperature | 0.55 (.83) | 13 (8.90) |
| 19. Diarrhea | 0.55 (.85) | 11 (7.53) |
| 20. Problems with sexual function | 0.23 (.67) | 11 (7.53) |
| 21. Problems with urination | 0.25 (.69) | 7 (4.79) |

**Notes:** ASEC, antidepressant side-effect checklist;SD, standard deviation

**Supplement Table 3** Summary of Treatment Preferences among Participants (N = 292)

| **Treatment preference** | **Adolescents *n* (%)** | **Legal guardians *n* (%)** |
| --- | --- | --- |
| Medication | 106 (72.60) | 125 (85.62) |
| Psychotherapy | 83 (56.85) | 125 (85.62) |
| Combined medication and psychotherapy | 64 (43.84) | 106 (72.60) |
| Exercise | 26 (17.81) | 39 (26.71) |
| Wait and see | 23 (15.75) | 5 (3.42) |

**Supplement Table 4** Correlation between Context Factors and Medication Adherence

| **Variables** | **1** | **2** | **3** | **4** | **5** | **6** | **7** | **8** | **9** | **10** |
| --- | --- | --- | --- | --- | --- | --- | --- | --- | --- | --- |
| 1. Medication regimens | 1.00 |  |  |  |  |  |  |  |  |  |
| 2. Depressive symptoms (TDI) | -0.22* | 1.00 |  |  |  |  |  |  |  |  |
| 3. Side effects (ASEC) | 0.17* | -0.64* | 1.00 |  |  |  |  |  |  |  |
| 4. Travel time | 0.16 | -0.04 | 0.01 | 1.00 |  |  |  |  |  |  |
| 5. Adolescents stigma (ISMI) | 0.27* | -0.63* | 0.47* | 0.11 | 1.00 |  |  |  |  |  |
| 6. Legal guardian stigma (PISMI) | 0.13 | -0.24* | 0.24* | -0.02 | 0.27* | 1.00 |  |  |  |  |
| 7. Patient-doctor relationship (PDRQ) | 0.05 | 0.28* | -0.21* | 0.04 | -0.26* | -0.14 | 1.00 |  |  |  |
| 8. Adolescent family function | 0.05 | 0.26* | -0.21* | 0.10 | -0.26* | -0.07 | 0.32* | 1.00 |  |  |
| 9. Legal guardian family function | -0.02 | 0.01 | -0.07 | 0.04 | -0.15 | -0.34* | 0.13 | 0.28* | 1.00 |  |
| 10. Medication adherence | -.06 | 0.14 | -0.20* | 0.04 | -0.03 | -0.04 | 0.09 | 0.10 | -0.01 | 1.00 |

**Notes: *** p < .05. ASEC, antidepressant side-effect checklist; CFI, Chulalongkorn family inventory; ISMI, internalized stigma of mental illness inventory; MMAS, Morisky medication adherence scale; PDRQ, patient-doctor relationship questionnaire; PISMI, parent internalized stigma of mental illness inventory; TDI, Thai depression inventory

**Supplement Table 5** Association of Psychosocial Intervention and Transportation Issues with Adolescent Medication Adherence (N = 292)

| **Variable** | **Response** | **N** | **Rank sum** | **Expected** | **z** | **p** |
| --- | --- | --- | --- | --- | --- | --- |
| Received intervention | Yes | 20 | 1417 | 1470 | 0.302 | 0.762 |
| No | 126 | 9314 | 9261 |  |  |
| Transportation issues | Yes | 33 | 1973.5 | 2425.5 | 2.121 | **0.034*** |
|  | No | 113 | 8757.5 | 8305.5 |  |  |

**Notes: *** p < .05.

**Supplement Table 6** Associations between Treatment Preference and Medication Adherence (N = 292)

| **Treatment preference** | **Adolescents (n = 146)** | | | | | | **Legal guardians (n = 146)** | | | | | |
| --- | --- | --- | --- | --- | --- | --- | --- | --- | --- | --- | --- | --- |
| **Prefer** | **N** | **Rank sum** | **Expected** | **z** | **p** | **Prefer** | **N** | **Rank sum** | **Expected** | **z** | **p** |
| Medication | Yes | 106 | 8230 | 7791 | -1.93 | 0.053 | Yes | 125 | 9569.5 | 9187.5 | -2.14 | **0.03*** |
| No | 40 | 2501 | 2940 |  |  | No | 21 | 1161.5 | 1543.5 |  |  |
| Psychotherapy | Yes | 83 | 5803 | 6100.5 | 1.179 | 0.24 | Yes | 125 | 9307.5 | 9187.5 | -0.67 | 0.50 |
| No | 63 | 4928 | 4630.5 |  |  | No | 21 | 1423.5 | 1543.5 |  |  |

**Notes: *** p < .05.

**Supplement Table 7** Association of Travel Time from Home Residence to the Hospital and Medication Adherence

| **Variable** | | **Sum of Squares** | **df** | ***Mean Square*** | **F** | **p** |
| --- | --- | --- | --- | --- | --- | --- |
| Travel time | Between groups | 1.82 | 3 | .61 | 0.16 | 0.933 |
| Within groups | 555.50 | 142 | 3.91 |  |  |
| Total | 557.33 | 145 | 3.84 |  |  |

**Notes:** df, degree of freedom.
